# Supplementary material for: Geodiversity primarily shapes large-scale limnology and aquatic species distribution in the northern Neotropics
Source: Copernicus journal article supplement (doi:10.5194/bg-2021-298), 2021-11-24
Supplement: Supplementary file 1 [file bg-2021-298-supplement.zip]

## ***Supplement of***

### **Geodiversity primarily shapes large-scale limnology and aquatic species distribution in the northern Neotropics**

Laura Macario-González et al.

*Correspondence to:* Sergio Cohuo (sergio.cd@chetumal.tecnm.mx)

#### **S1. Structural Equation Modelling, models performance and results.**

The Structural Equation Modelling technique was used to evaluate the direct and indirect influence of geodiversity and related environmental and limnological variables on ostracode species composition. Given regional factors such as the highly variable topography in Central America, diverse geological history and environmental variability within regions (latitude), mainly related to precipitation and temperature, we assume that elevation gradients, bedrock and latitude were primary factors determining biological composition in aquatic systems. These three factors were then used as exogenous variables and we also test the performance of geodiversity (considered as the sum of topography and geological history) as exogenous variable. Limnology was considered as an endogenous variable as water chemistry and physical parameters of lakes, are strongly influenced by geodiversity. The effect of vulcanism, evaporation/precipitation and marine-freshwater interactions was also considered as explanatory variables, by using the presence of conservative and specific major anion and cations.

To evaluate the direct and indirect contribution of each variable to biological composition, we analyze five different SEM models. Models were fitted with a covariance data matrix with a set of uncorrelated variables. Model performances were evaluated with the Chi-square test, the Root Mean Square Error (RMSE), comparative fit index (CFI) and standardized root mean squared residuals (srmr).

Model 1, 2 and 3: The first three models tested the simplified relationships between geodiversity, limnology, and species composition. On all these models, geodiversity and related variables were considered as exogenous variables, but all models differ in the predictors used for both exogenous and endogenous variables. Model 1, uses bedrock, elevation, and TOC as predictors of geodiversity as they received high scores in the PCA. Limnology (as endogenous variable) uses as indicators conductivity, pH and selected major ions such as  $\text{HCO}_3^-$ . This model did not converge and therefore did not find a statistical solution. Model 2 was then constructed with a reduced number of predictors. Geodiversity was constructed only with elevation and latitude as predictors, whereas limnology only with conductivity. The selection of these variables resulted from the fact that elevation was directly related with water temperature in lakes and latitude with presence of carbonates given reduction in precipitation and increase evaporation which is typical in the highlands of Central America. This model received acceptable scores but was considered too simplified. Model 3 was a variant of the model 2 but incorporates again variables identified in PCA as most influential for limnological regions. For instance,

geodiversity was constructed with elevation and carbonates as in Yucatán Peninsula carbonates dominates mineral composition on lake sediments. This model shows poor fit of data, Chi-square test reject the model (highly significant Chi-square) and some paths were not significant.

Model 4. This model was constructed on the basis of the model 2 and 3 with respect of predictors of geodiversity and limnology. On this model, we tested the direct effect of geodiversity on species composition. Furthermore, we evaluate the individual influence of altitude and conductivity for species composition. These two variables were selected considering that PCA suggests major influence on limnological regionalization in the study area. This model had a better fit than model 3, but as Chi square was highly significant, the model was rejected.

Model 5. This model shows the best performance and was the reported in the main text of this study. This model was constructed using geodiversity as unique exogenous and latent variable, constructed out from mineralogical components of sediments such as carbonates and TOC. Limnology and altitude were considered as endogenous variables. Furthermore, the individual influence of geodiversity, altitude and conductivity over biological composition were tested. The global fit resulted in CFI = 0.961, RMSEA = 0.01 and SRMR=0.036, Chi-square = 2.6, d.f.= 5. P-value = 0.757.

Model 5, optimal model full output:

lavaan 0.6-9 ended normally after 94 iterations

|                            |        |
|----------------------------|--------|
| Estimator                  | ML     |
| Optimization method        | NLMINB |
| Number of model parameters | 16     |
| Number of observations     | 66     |

Model Test User Model:

|                      |       |
|----------------------|-------|
| Test statistic       | 2.628 |
| Degrees of freedom   | 5     |
| P-value (Chi-square) | 0.757 |

Model Test Baseline Model:

|                    |        |
|--------------------|--------|
| Test statistic     | 77.377 |
| Degrees of freedom | 15     |
| P-value            | 0.000  |

User Model versus Baseline Model:

|                             |       |
|-----------------------------|-------|
| Comparative Fit Index (CFI) | 0.961 |
| Tucker-Lewis Index (TLI)    | 0.978 |

Loglikelihood and Information Criteria:

|                                       |          |
|---------------------------------------|----------|
| Loglikelihood user model (H0)         | -325.353 |
| Loglikelihood unrestricted model (H1) | -324.040 |
| Akaike (AIC)                          | 682.707  |
| Bayesian (BIC)                        | 717.741  |
| Sample-size adjusted Bayesian (BIC)   | 667.370  |

Root Mean Square Error of Approximation:

|                                        |       |
|----------------------------------------|-------|
| RMSEA                                  | 0.010 |
| 90 Percent confidence interval - lower | 0.000 |
| 90 Percent confidence interval - upper | 0.119 |
| P-value RMSEA <= 0.05                  | 0.815 |

Standardized Root Mean Square Residual:

SRMR

0.036

## Parameter Estimates:

| Standard errors<br>Information<br>Information saturated (h1) model |          |         | Standard<br>Expected<br>Structured |         |        |         |
|--------------------------------------------------------------------|----------|---------|------------------------------------|---------|--------|---------|
| Latent variables:                                                  |          |         |                                    |         |        |         |
|                                                                    | Estimate | Std.Err | z-value                            | P(> z ) | Std.lv |         |
| Std.all                                                            |          |         |                                    |         |        |         |
| geology =~                                                         |          |         |                                    |         |        |         |
| Carbonates                                                         | 1.000    |         |                                    |         | 1.372  |         |
| 0.642                                                              |          |         |                                    |         |        |         |
| TOC                                                                | 0.027    | 0.049   | 0.549                              | 0.583   | 0.037  |         |
| 0.074                                                              |          |         |                                    |         |        |         |
| limnology =~                                                       |          |         |                                    |         |        |         |
| cond                                                               | 1.000    |         |                                    |         | 0.399  |         |
| 0.824                                                              |          |         |                                    |         |        |         |
| HCO3                                                               | 0.448    | 0.109   | 4.099                              | 0.000   | 0.179  |         |
| 0.586                                                              |          |         |                                    |         |        |         |
| speciescomposition =~                                              |          |         |                                    |         |        |         |
| diversity                                                          | 1.000    |         |                                    |         | 0.356  |         |
| 1.000                                                              |          |         |                                    |         |        |         |
| Altitud =~                                                         |          |         |                                    |         |        |         |
| Altitude                                                           | 1.000    |         |                                    |         | 0.871  |         |
| 1.000                                                              |          |         |                                    |         |        |         |
| Regressions:                                                       |          |         |                                    |         |        |         |
|                                                                    | Estimate | Std.Err | z-value                            | P(> z ) | Std.lv | Std.all |
| limnology ~                                                        |          |         |                                    |         |        |         |
| geology                                                            | 0.306    | 0.085   | 3.590                              | 0.000   | 1.053  | 1.053   |
| Altitud ~                                                          |          |         |                                    |         |        |         |
| geology                                                            | -0.366   | 0.093   | -3.934                             | 0.000   | -0.577 | -0.577  |
| speciescomposition ~                                               |          |         |                                    |         |        |         |
| limnology                                                          | -1.575   | 4.499   | -0.350                             | 0.726   | -1.765 | -1.765  |
| Covariances:                                                       |          |         |                                    |         |        |         |
|                                                                    | Estimate | Std.Err | z-value                            | P(> z ) | Std.lv |         |
| Std.all                                                            |          |         |                                    |         |        |         |
| geology ~~                                                         |          |         |                                    |         |        |         |
| .speciescompstn                                                    | 0.970    | 2.596   | 0.374                              | 0.709   | 0.865  |         |
| 0.865                                                              |          |         |                                    |         |        |         |
| .speciescomposition ~~                                             |          |         |                                    |         |        |         |
| .Altitud                                                           | -0.080   | 0.041   | -1.945                             | 0.052   | -0.138 | -       |
| 0.138                                                              |          |         |                                    |         |        |         |
| .cond ~~                                                           |          |         |                                    |         |        |         |
| .diversity                                                         | -0.032   | 0.026   | -1.205                             | 0.228   | -0.032 | -       |
| Inf                                                                |          |         |                                    |         |        |         |
| Variances:                                                         |          |         |                                    |         |        |         |
|                                                                    | Estimate | Std.Err | z-value                            | P(> z ) | Std.lv | Std.all |
| .Carbonates                                                        | 2.685    | 0.644   | 4.172                              | 0.000   | 2.685  | 0.588   |
| .TOC                                                               | 0.249    | 0.043   | 5.739                              | 0.000   | 0.249  | 0.995   |
| .cond                                                              | 0.075    | 0.033   | 2.261                              | 0.024   | 0.075  | 0.321   |
| .HCO3                                                              | 0.061    | 0.012   | 4.969                              | 0.000   | 0.061  | 0.656   |
| .diversity                                                         | 0.000    |         |                                    |         | 0.000  | 0.000   |
| .Altitude                                                          | 0.000    |         |                                    |         | 0.000  | 0.000   |
| geology                                                            | 1.882    | 0.781   | 2.411                              | 0.016   | 1.000  | 1.000   |
| .limnology                                                         | -0.017   | 0.047   | -0.372                             | 0.710   | -0.110 | -0.110  |
| .speciescompstn                                                    | 0.668    | 2.735   | 0.244                              | 0.807   | 5.265  | 5.265   |
| .Altitud                                                           | 0.506    | 0.106   | 4.762                              | 0.000   | 0.667  | 0.667   |
| R-Square:                                                          |          |         |                                    |         |        |         |
|                                                                    | Estimate |         |                                    |         |        |         |
| Carbonates                                                         | 0.412    |         |                                    |         |        |         |
| TOC                                                                | 0.005    |         |                                    |         |        |         |
| cond                                                               | 0.679    |         |                                    |         |        |         |
| HCO3                                                               | 0.344    |         |                                    |         |        |         |
| diversity                                                          | 1.000    |         |                                    |         |        |         |
| Altitude                                                           | 1.000    |         |                                    |         |        |         |
| limnology                                                          | NA       |         |                                    |         |        |         |
| speciescompstn                                                     | -4.265   |         |                                    |         |        |         |
| Altitud                                                            | 0.333    |         |                                    |         |        |         |

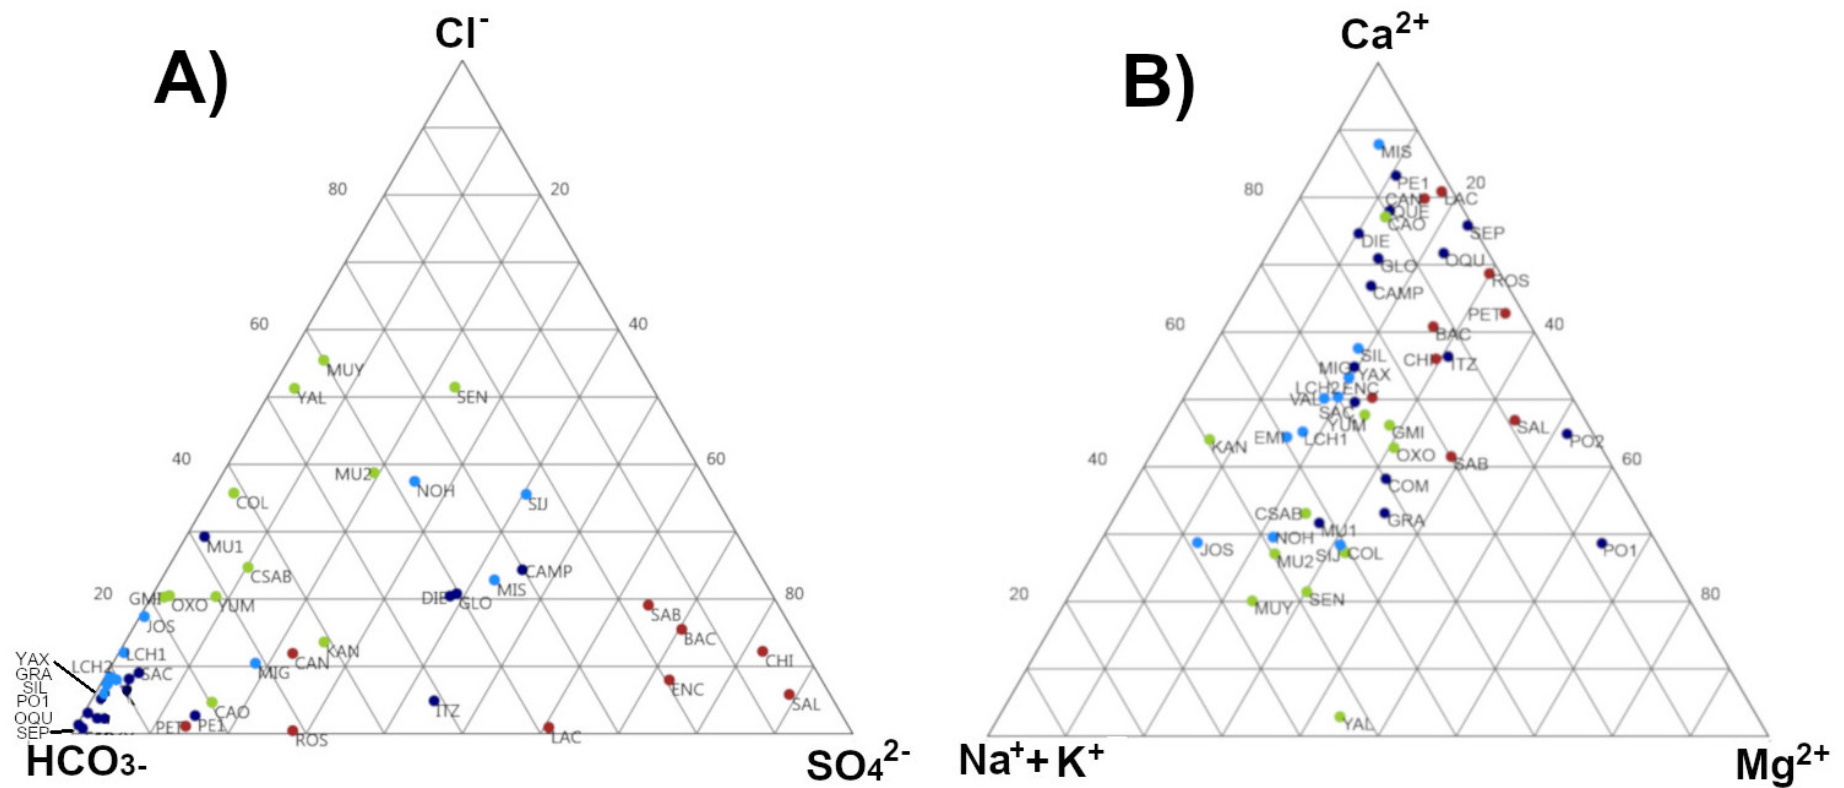

**Figure S1.** Ternary plots showing major cations and anion proportions [%] of 76 aquatic systems of the northern Neotropical region. Major anions (A) and major cations (B) from YG limnological group; Abbreviations correspond to those in Table S1, colors representing limnological subregions, correspond to the cluster analysis dendrogram (Fig. 2).

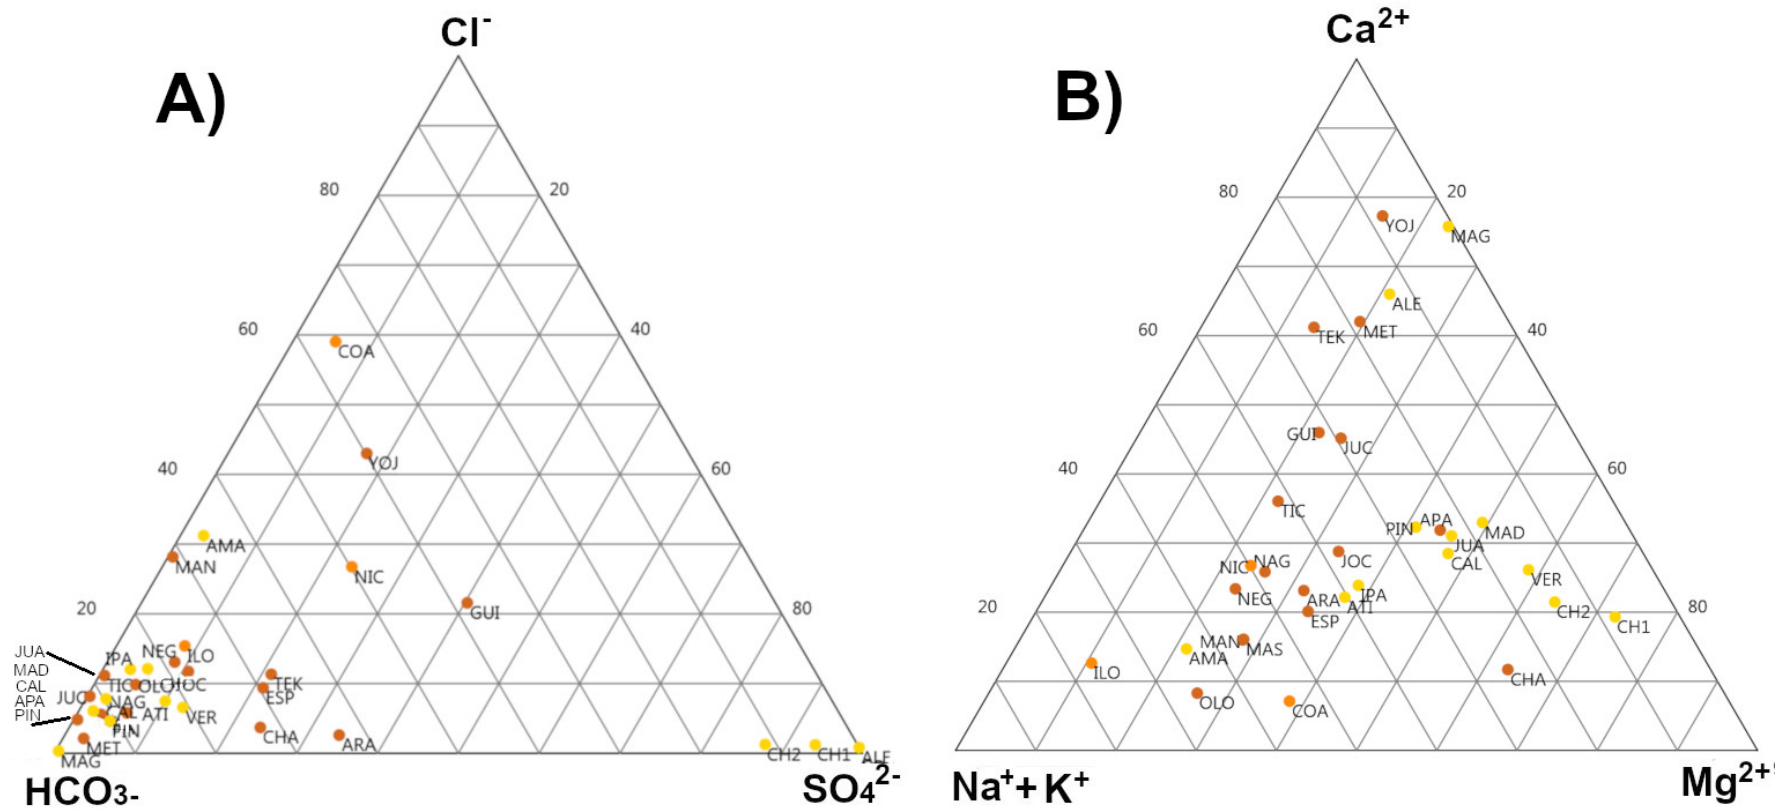

Figure S2. Ternary plots showing major cations and anion proportions [%] of 76 aquatic systems of the northern Neotropical region. A) major anion from GSHN limnological group; d) major cation from GSHN limnological group. Abbreviations correspond to those in Table S1 and colors, representing limnological subregions, correspond to the cluster analysis dendrogram (Fig).

**Table S2.1. Loading values of the 13 variables used for principal component analysis of the YG region (P <0.05). Significant scores for components 1 and 2 in bold.**

| <b>Variable</b>               | <b>PC1 (23.47 %)</b> | <b>PC2 (14.63 %)</b> |
|-------------------------------|----------------------|----------------------|
| Temperature                   | 0.02                 | 0.35                 |
| DO                            | 0.06                 | 0.45                 |
| pH                            | 0.01                 | <b>0.73</b>          |
| Conductivity                  | <b>0.77</b>          | 0.04                 |
| HCO <sub>3</sub> <sup>-</sup> | 0.13                 | 0.05                 |
| Cl <sup>-</sup>               | <b>0.64</b>          | 0.06                 |
| Na <sup>+</sup>               | <b>0.72</b>          | 0.04                 |
| Ca                            | 0.51                 | 0.11                 |
| Mg <sup>2+</sup>              | <b>0.65</b>          | 0.04                 |
| TOC                           | 0.10                 | 0.13                 |
| Altitude                      | 0.40                 | 0.12                 |
| SO <sub>4</sub> <sup>2-</sup> | 0.47                 | 0.12                 |
| Age                           | 0.43                 | 0.47                 |

**Table S2.2. Loading values of the 13 variables used for principal component analysis of the GSHN limnological region (P <0.05). Significant scores for components 1 and 2 in bold.**

| <b>Variable</b>               | <b>PC1 (26.83%)</b> | <b>PC2 (22.89%)</b> |
|-------------------------------|---------------------|---------------------|
| Conductivity                  | 0.57                | 0                   |
| HCO <sub>3</sub> <sup>-</sup> | <b>0.70</b>         | 0.11                |
| Cl <sup>-</sup>               | <b>0.62</b>         | 0.08                |
| Na <sup>+</sup>               | <b>0.72</b>         | 0.07                |
| Ca                            | 0.33                | 0.15                |
| Mg <sup>2+</sup>              | 0.48                | 0.05                |
| TN                            | 0.01                | 0.62                |
| TOC                           | 0.01                | <b>0.79</b>         |
| Phyllosilicates               | 0.11                | 0.20                |
| Altitude                      | 0.11                | 0.09                |
| CO <sub>3</sub> <sup>-</sup>  | <b>0.56</b>         | 0.17                |
| Bedrock                       | 0.12                | <b>0.75</b>         |
| Age                           | 0.23                | <b>0.80</b>         |

**Table S3. List of ostracode species found in our study.**

| #  | Species name                                                             | Species code             | #  | Species name                                             | Species code                  |
|----|--------------------------------------------------------------------------|--------------------------|----|----------------------------------------------------------|-------------------------------|
| 1  | <i>Alicenula serricaudata</i> (Klie, 1935a)                              | ASE                      | 36 | <i>Hemicypris</i> sp.1                                   | <i>Hemicypris</i> sp.         |
| 2  | <i>Alicenula yucatanensis</i> sp. nov.                                   | AYU                      | 37 | <i>Heterocypris nicaraguensis</i> Hartmann 1959          | HNI                           |
| 3  | <i>Candona</i> sp. 1                                                     | <i>Candona</i> sp.       | 38 | <i>Heterocypris punctata</i> (Keyser, 1975)              | HPU                           |
| 4  | <i>Cypretta campechensis</i> Cohuo-Durán <i>et al.</i> , 2013            | CCA                      | 39 | <i>Keysercypria</i> sp. 1                                | <i>Keysercypria</i> sp. 1     |
| 5  | <i>Cypretta</i> cf. <i>campechensis</i> Cohuo-Durán <i>et al.</i> , 2013 | CCAf                     | 40 | <i>Keysercypria</i> sp. 2                                | <i>Keysercypria</i> sp. 2     |
| 6  | <i>Chlamydotheca</i> cf. <i>colombiensis</i> Roessler 1985               | CCOf                     | 41 | <i>Keysercypria</i> sp. 3                                | <i>Keysercypria</i> sp. 3     |
| 7  | <i>Cypretta elongata</i> sp. nov.                                        | CEL                      | 42 | <i>Keysercypria</i> sp. 4                                | <i>Keysercypria</i> sp. 4     |
| 8  | <i>Cypretta</i> cf. <i>elongata</i>                                      | CELf                     | 43 | <i>Keysercypria</i> sp. 5                                | <i>Keysercypria</i> sp. 5     |
| 9  | <i>Cypria gibbera</i> Furtos, 1936a                                      | CGI                      | 44 | <i>Keysercypria granadae</i> (Hartmann 1959)             | KGR                           |
| 10 | <i>Chlamydotheca</i> sp. 1                                               | <i>Chlamydotheca</i> sp. | 45 | <i>Limnocythere floridensis</i> Keyser, 1975             | LFL                           |
| 11 | <i>Cytheridella ilosvayi</i> Daday, 1905                                 | CIL                      | 46 | <i>Limnocythere</i> sp. 1                                | <i>Limnocythere</i> sp.       |
| 12 | <i>Cypretta maya</i> Cohuo-Durán <i>et al.</i> , 2013                    | CMA                      | 47 | <i>Limnocytherina royi</i> Hartmann 1959                 | LRO                           |
| 13 | <i>Cypria petenensis</i> Ferguson <i>et al.</i> , 1964                   | CPE                      | 48 | <i>Limnocythere</i> cf. <i>stationis</i> Vávra, 1891     | LST                           |
| 14 | <i>Cypretta spinosa</i> Cohuo-Durán <i>et al.</i> , 2013                 | CSP                      | 49 | <i>Neocypridopsis</i> sp. 1                              | <i>Neocypridopsis</i> sp.     |
| 15 | <i>Cyprinotus unispinifera</i> Furtos, 1936b                             | CUN                      | 50 | <i>Pseudocandona antilliana</i> Broodbakker, 1983c       | PAN                           |
| 16 | <i>Chlamydotheca unispinosa</i> (Baird, 1862)                            | CUNI                     | 51 | <i>Peryssocytheridea</i> cf. <i>cribrosa</i> Klie, 1933a | PCRf                          |
| 17 | <i>Cypridopsis</i> sp. [Ca 1]                                            | <i>CVI</i> sp 1          | 52 | <i>Penthasilenula</i> sp. 1                              | <i>Penthasilenula</i> sp.     |
| 18 | <i>Cypridopsis</i> sp. [Ca 2]                                            | <i>CVI</i> sp 2          | 53 | <i>Potamocypris islagrandensis</i> Hoff 1943b            | PIS                           |
| 19 | <i>Cypridopsis</i> sp. [Ca 3]                                            | <i>CVI</i> sp 3          | 54 | <i>Pericythere marginata</i> Hartmann, 1959              | PMA                           |
| 20 | <i>Cypridopsis</i> sp. 4                                                 | <i>CVI</i> sp 4          | 55 | <i>Paracythereis opesta</i> (Brehm, 1939)                | POP                           |
| 21 | <i>Cypridopsis</i> sp. 5                                                 | <i>CVI</i> sp 5          | 56 | <i>Potamocypris</i> sp.1                                 | <i>Potamocypris</i> sp. 1     |
| 22 | <i>Cypridopsis</i> sp. 6                                                 | <i>CVI</i> sp 6          | 57 | <i>Potamocypris</i> sp. 2                                | <i>Potamocypris</i> sp. 2     |
| 23 | <i>Cypridopsis</i> sp. 7                                                 | <i>CVI</i> sp 7          | 58 | <i>Potamocypris</i> sp. 3                                | <i>Potamocypris</i> sp. 3     |
| 24 | <i>Cypricercinae</i> sp. 1                                               | CYP 1                    | 59 | <i>Pseudocandona</i> sp. 1                               | <i>Pseudocandona</i> sp. 1    |
| 25 | <i>Cypricercinae</i> sp. 2                                               | CYP 2                    | 60 | <i>Pseudocandona</i> sp. 2                               | <i>Pseudocandona</i> sp. 2    |
| 26 | <i>Cypricercinae</i> sp. 3                                               | CYP 3                    | 61 | <i>Pseudostrandesia</i> sp. 1                            | <i>Pseudostrandesia</i> sp. 1 |
| 27 | <i>Cyprinotinae</i> sp. 1                                                | CYP 4                    | 62 | <i>Pseudostrandesia</i> sp. 2                            | <i>Pseudostrandesia</i> sp. 2 |
| 28 | <i>Cypria</i> sp. 1                                                      | <i>Cypria</i> sp. 1      | 63 | <i>Strandesia bicuspis</i> (Claus 1892)                  | SBI                           |
| 29 | <i>Cypria</i> sp. 4                                                      | <i>Cypria</i> sp. 4      | 64 | <i>Stenocypris cylindrical major</i> (Baird, 1859b)      | SCY                           |
| 30 | <i>Cypria</i> sp. 5                                                      | <i>Cypria</i> sp. 5      | 65 | <i>Strandesia intrepida</i> Furtos, 1936b                | SIN                           |
| 31 | <i>Cyprideis</i> cf. <i>salebrosa</i>                                    | <i>Cyprideis</i> sp.     | 66 | <i>Strandesia</i> sp. 1                                  | <i>Strandesia</i> sp.         |
| 32 | <i>Cyprididae</i> sp. [Ca 1]                                             | <i>Cyprididae</i> sp. 1  | 67 | <i>Tanycypris</i> sp. 1                                  | <i>Tanycypris</i> sp.         |
| 33 | <i>Desc. 1</i>                                                           | <i>Cyprididae</i> sp.2   | 68 | <i>Thalassocypris</i> sp.1                               | <i>Thalassocypris</i> sp.     |
| 34 | <i>Diaphanocypris meridana</i> (Furtos, 1936b)                           | DME                      | 69 | <i>Vestalenula</i> sp.1                                  | <i>Vestalenula</i> sp.        |
| 35 | <i>Darwinula stevensoni</i> (Brady & Robertson, 1885)                    | DST                      | 70 | <i>Vestalenula paglioli</i> (Pinto and Kotzian 1961)     | VPA                           |

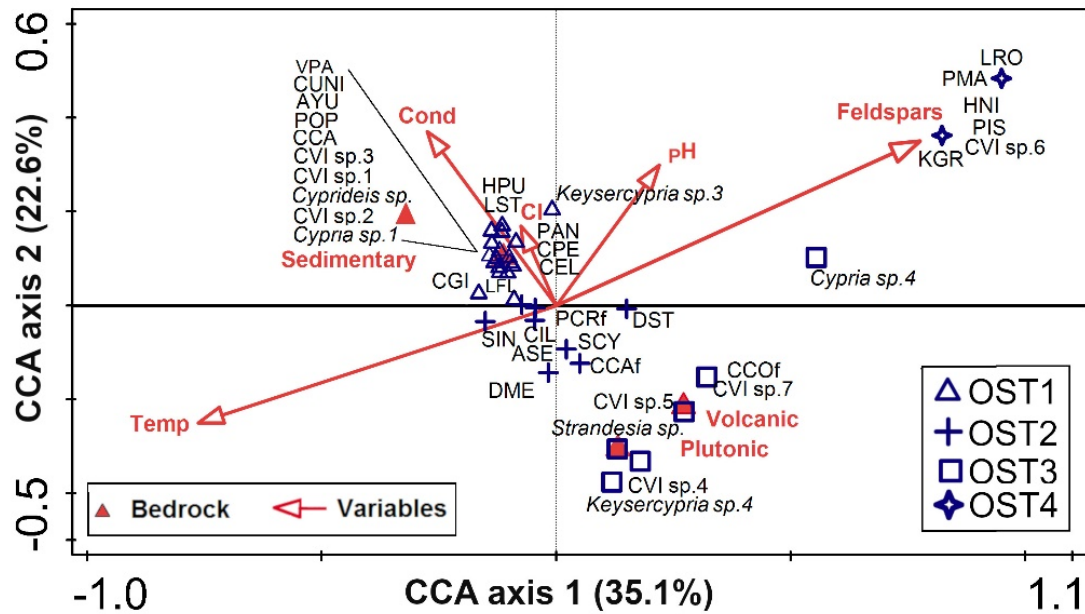

Figure S3. Canonical Correspondence Analysis (CCA) biplot for axis 1 and 2 showing the relationship between 39 ostracode species and eight forward selected explanatory variables (Monte Carlo  $p=0.001$ ). Blue symbols represent species belonging to ostracode groups identified by NMDS analysis. Filled triangles represent categorical bedrock type (Sedimentary, Volcanic, Plutonic) and red arrows are showing numerical variables used on the analysis. The first two axes explain 57.7% of the total variance. For species name abbreviations see Table S3. Abbreviations for variables are as follows: Temperature (Temp), conductivity (cond), chloride (Cl).



**Table S4.1 Forward selection results of explanatory variables and percentage of variance in the species data explained by each variable (P <0.01).**

| Variable        | % variance in species data | P-value (999 permutations) |
|-----------------|----------------------------|----------------------------|
| Sedimentary*    | 7.9                        | 0.001                      |
| Feldspars       | 6.7                        | 0.001                      |
| Cl <sup>-</sup> | 3.7                        | 0.001                      |
| Temperature     | 3.8                        | 0.001                      |
| Volcanic*       | 2.8                        | 0.008                      |
| Plutonic*       | 2.8                        | 0.008                      |
| pH              | 1.9                        | 0.044                      |
| Conductivity    | 1.4                        | 0.284                      |

\*Bedrock type

**Table S4.2 Summary of results from canonical correspondence analysis based on 39 ostracode species and eight forward-selected explanatory variables.**

| Axes                                                  | 1     | 2     | 3     | 4     | Total inertia |
|-------------------------------------------------------|-------|-------|-------|-------|---------------|
| Eigenvalues                                           | 0.68  | 0.44  | 0.34  | 0.22  | 6.91          |
| Species-environment correlations                      | 0.93  | 0.83  | 0.8   | 0.72  |               |
| Cumulative percentage variance of species data        | 9.91  | 16.28 | 21.21 | 24.45 |               |
| Cumulative percentage of species-environment relation | 35.17 | 57.79 | 75.28 | 86.79 |               |
| Sum all unconstrained eigenvalues                     |       |       |       |       | 6.91          |
| Sum all canonical eigenvalues                         |       |       |       |       | 1.94          |

DCA values = 6.8 SD (First axis) and 4.9 SD (Second axis).
