# Supplementary material for: Geodiversity primarily shapes large-scale limnology and aquatic species distribution in the northern Neotropics
Source: Copernicus journal article supplement (doi:10.5194/bg-2021-298), 2021-11-24
Supplement: Supplementary file 2 [file bg-2021-298-supplement.zip]

Archive with 2 entries (2 files):
- Copia de Table S1.xlsx
- supplement of Macario-Gonzalez et al..pdf
