# Supplementary material for: Geodiversity primarily shapes large-scale limnology and aquatic species distribution in the northern Neotropics
Source: Copernicus journal article supplement (doi:10.5194/bg-2021-298), 2021-11-24
Supplement: Supplementary file 2 [file bg-2021-298-supplement.zip › Copia de Table S1.xlsx]

## Sheet: Table S1
Table S1. Geological, limnological, sedimentological and mineralogical data of the 76 aquatic ecosystems
ID	Altitude (ma.s.l)	Water temperature (ºC)	Dissolved oxygen (µmol/l)	pH	Conductivity (µS/cm)	CO3 -	HCO3 -	SO42	Cl-	Na+	K+	Ca2+	Mg2+	TC	TN	TIC	TOC	Quartz	Carbonates	Phyllosilicates	Feldspars	Bedrock type	Age of the sediment
						(mg/L)								%				intensities as cps = counts per second
ALE	1272	23.3	3.65	3.2	100	0	0	530.5	3.31	21.54	6.15	112.1	21.89	3.77	0.3312	0.113869	3.65613	672	0	229	1157	Volcanic	Quaternary
AMA	1193	26.7	5.59	8.79	558	0	186.66	13.02	104.6	82	12.27	17.86	15.9	9.47	0.8741	1.50965	7.96035	630	17902	2900	3757	Volcanic	Miocene
APA	509	29.5	2.82	8.574	100	0	145.18	7.59	10.5	10.8	7.54	17.86	15.21	5.55	0.4502	0.323746	5.22625	5362	0	4498	15222	Volcanic	Quaternary
ARA	76	33.1	4.12	8.4	100	9.6	196.42	172.2	9.8	69.7	9.7	33.68	28.31	1.07	-	0.532225	0.537775	3734	0	0	58600	Volcanic	Quaternary
ATI	1556	23.5	5.72	8.9	442	12	195.2	38.96	21.6	44.8	5.64	22.96	23.67	3.49	0.2553	0.577449	2.91255	0	0	0	0	Volcanic	Miocene
BAC	4	30.5	7.4	8.31	2120	0	153.6	1221.2	199	83	4.33	361	96.51	12.5	0.0684	10.0838	2.41619	2552	115619	0	0	Sedimentary	Miocene
CAL	1790	21.2	4.9	9.2	100	0	170.8	7.62	17.6	17	5.63	20.67	20.88	4.13	0.2882	0.140134	3.98987	1640	0	530	75200	Volcanic	Quaternary
CAMP	43	30.1	6.81	7.36	86	-	85	-	-	4	-	28	4	10.3	0.9	0	10.3	-	-	-	-	Sedimentary	Miocene
CAN	32	29.9	4.4	7.14	1110	-	384	-	-	17	-	359	44	12	0.2145	8.1389	3.8611	1515	101539	2394	0	Sedimentary	Quaternary
CAO	126	28.9	1.45	7.35	353	0	203.23	63.62	14.1	6.96	8.7	76.86	7.53	12.2	0.6691	4.89527	7.30473	11347	89452	4685	0	Sedimentary	Eocene
CH1	2726	19.7	5.41	9	11.5	0	7.32	-	2.01	0.18	0.48	0.96	2.2	4.07	0.3064	0.221964	3.84804	1800	5800	540	114000	Volcanic	Quaternary
CH2	1925	21.5	1.86	7.398	100	0	17.08	-	2.25	1.24	0.94	2.3	4.18	4.02	0.3832	0.122499	3.8975	16744	0	7872	1927	Volcanic	Miocene
CHA	477	29.6	3.36	9.22	100	24	240.34	131.31	15.2	39.5	10.44	18.37	60.33	5.8	0.338	0.767498	5.0325	1800	8100	0	38200	Volcanic	Quaternary
CHI	1	31.7	6.8	8.74	3780	0	115.79	2812.6	309	216	6.37	735.1	235.4	16.6	0.7449	6.8148	9.7852	0	42727	0	0	Sedimentary	Eocene
COA	743	28.5	2.24	8.75	200	21.6	283.04	202.4	375	207.25	36.5	25.9	84.31	3.56	-	2.90575	0.654249	21030	6500	0	178600	Volcanic	Quaternary
COL	11	31	7.7	8.6	970	9.3	311.94	23.62	218	103.7	3.24	61.66	44.4	23.3	0.714	7.49974	15.8003	0	85708	0	0	Sedimentary	Neogene
COM	20	31	5.6	7.4	251	0	156.16	3.14	10.2	16.5	4.8	21.48	10.93	9.83	0.8409	0.421216	9.40878	2988	0	11020	2610	Sedimentary	Quaternary
CSAB	18	30.7	12.4	8.41	940	0	343.84	86.21	154.5	244	8.35	167.64	74.78	14.5	0.2706	4.94013	9.55987	3304	645033	0	0	Sedimentary	Eocene
DIE	156	28.6	8.2	8.2	179	-	140	-	-	4	-	36	3	-	-	-	-	-	-	-	-	Sedimentary	Cretaceous
EMI	23	31.7	8.39	9.29	186	0	132.33	3.94	13.9	22.1	4.6	24.28	5.37	19	1.729	0.441595	18.5584	9200	0	9726	0	Sedimentary	Eocene
ENC	4	29	6.5	8	3400	0	285.94	1701	138.5	190.3	10.8	335.28	98.15	18.5	1.036	6.29427	12.2057	490	83907	1083	0	Sedimentary	Miocene
ESP	689	30.4	6.6	8.495	84.5	0	31.72	15.45	5.07	5.71	7.47	3.84	3.95	2.92	0.1775	0.436553	2.48345	1810	0	7833	2700	Volcanic	Quaternary
GLO	138	33.5	6.91	8.2	169	-	134	-	-	5	-	40	5	-	-	-	-	-	-	-	-	Sedimentary	Cretaceous
GMI	32	27	3.25	7.4	910	0	427.73	14.44	131.5	66	2	106	39.73	-	-	-	-	0	6640	1432	794	Sedimentary	Eocene
GRA	5	27	3.7	7.43	110	0	73.2	4.98	6.24	8.85	3.4	9.59	6.05	9.41	0.6478	0.18368	9.22632	3512	0	8497	2867	Sedimentary	Quaternary
GUI	431	29.8	2.24	8.617	296	-	122	-	-	17	-	27	8	-	-	-	-	-	-	-	-	Volcanic	Quaternary
ILO	446	29.7	2.82	8.9	1200	27.6	246.44	61.95	509	291.3	28.7	44.12	22.68	1.6	0.07	0.7	0.9	-	-	-	-	Volcanic	Quaternary
IPA	1495	22.7	2.77	8.01	100	0	45.14	2.91	7.6	6.35	4.66	4.99	4.88	7.35	0.588	0.120286	7.22971	2728	727	6822	13440	Volcanic	Quaternary
ITZ	112	30	5.65	8.4	512	0	115	158	13	12	5	57	19	-	-	-	-	-	-	-	-	Sedimentary	Paleocene
JOC	26	32	3	8	595	0	246	54.48	44	51.75	8.54	37.53	26.55	11.1	0.76	0.886567	10.2134	2776	0	7555	7268	Volcanic	Quaternary
JOS	118	29.4	5	8.6	457	0	267	3	67	79.6	12.6	37	9.81	42.4	3.64	0.1	42.3	-	-	-	-	Sedimentary	Eocene
JUA	1285	25	5.96	8.65	32.2	0	21	0.65	1.64	1.67	1.61	3.12	2.84	5.13	0.3414	0.165598	4.9644	4060	1290	1290	44000	Volcanic	Quaternary
JUC	27	30.4	1.03	7.25	100	0	225	1.24	23.8	28.04	4	40.66	13.99	25.1	1.646	0.0909594	25.009	10639	0	11177	4050	Plutonic	Cretaceous
KAN	5	26.1	7.54	8.4	940	-	311	-	-	244	-	192	17	14.7	0.33	10	4.7	-	-	-	-	Sedimentary	Eocene
LAC	170	29.1	4.81	7.99	906	0	162.66	410.15	4.75	3.7	0.44	195.51	26.08	12.9	0.1055	10.8618	2.03823	468	126379	264	0	Sedimentary	Tertiary
LCH1	6	33.1	9.4	9.94	241	0	165.42	1.95	27	27	7.6	33.38	8	39.7	2.25	0.1	39.6	-	-	-	-	Sedimentary	Quaternary
LCH2	109	29	1.35	7.28	136	0	99.25	1.15	10.9	11.54	5.66	21.74	5.18	33.6	3.302	0.122587	33.4774	0	0	14513	1500	Sedimentary	Eocene
MAD	1866	20.6	2.72	8.448	100	0	8.9	0.95	1.55	0.54	0.73	1.56	1.42	15.9	0.9536	0.372609	15.5274	8163	0	13614	9758	Volcanic	Miocene
MAG	2863	12.5	6.19	8.75	331	0	217.31	1.33	0.83	0.37	0.36	57.48	10.9	9.38	0.401	2.62356	6.75644	19036	53276	5335	0	Sedimentary	Jurasic
MAN	41	22.8	1.8	9.1	100	0	-	2.3	-	54	15.7	15.64	16.59	0.299	-	0.147903	0.151097	3200	0	0	104000	Volcanic	Quaternary
MAS	222	22.4	2.26	9.246	100	9.98	232.2	1.84	14.3	53.5	15.6	15.64	16.54	7.82	0.4785	0.398633	7.42137	3000	10670	1030	40000	Volcanic	Quaternary
MET	450	30.1	3.1	8.4	255	0	124.54	5.37	3.3	8.4	2.42	28.54	5.45	4.73	0.413	0.161747	4.56825	43382	2580	9355	10006	Volcanic	Quaternary
MIG	31	30.5	6.65	8.95	327	0	153.6	62.98	26.7	23.12	8.6	48.13	10.83	21.9	1.189	3.5726	18.3274	4922	73911	1595	0	Sedimentary	Neogene
MIS	53	30.8	7.73	8.3	1230	-	104	-	-	23	-	351	15	10.5	1.15	0.151676	10.3483	16705	604	1846	715	Sedimentary	Eocene
MU1	3	30	5.9	9.1	439	0	143.6	7.9	72.7	28.12	4.55	20.33	10.43	4.08	0.2809	0.133701	3.9463	10450	2400	3018	85400	Sedimentary	Quaternary
MU2	17	27.5	3.68	7.38	1530	0	426.55	314.5	466.5	320	8.79	154.15	80.63	28	1.068	2.21193	25.7881	1922	67180	1100	0	Sedimentary	Eocene
MUY	-1	30.3	7.8	8.9	1130	0	209.14	37.75	343	164.5	4.31	52.01	37.66	15.8	0.4854	8.70443	7.09557	0	101867	0	0	Sedimentary	Neogene
NAG	43	31	3	6.9	86	0	41.93	4.63	3.27	6.1	6.83	4.69	2.84	-	-	-	-	-	-	-	-	Volcanic	Quaternary
NEG	102	29.9	5.22	9.2	40	0	34.95	5.95	6.89	6.5	9.9	4.69	2.84	9.53	-	0.302682	9.22732	4069	1690	20220	3815	Volcanic	Quaternary
NIC	37	21.2	2.27	8.944	100	0	95.31	16.93	22.8	25.5	5.05	13.29	7.11	-	-	-	-	-	-	-	-	Volcanic	Quaternary
NOH	1	32.4	7.67	9.2	577	0	108.7	117.07	129	76.5	9.9	43.47	19.54	21.9	-	3.4	18.5	-	-	-	-	Sedimentary	Neogene
OLO	66	29.4	2.5	7.685	105	0	133.43	12.93	18.3	40.62	9.7	5.08	9.72	7.13	0.5827	0.170218	6.95978	3850	2630	7380	0	Volcanic	Quaternary
OQU	150	33	3.68	7.68	183	0	115.64	4.06	3.28	1.46	2.17	29.71	5.69	23	2.115	0.0628432	22.9372	1379	0	8100	0	Sedimentary	Cretaceous
OXO	18	24.9	4.6	7.75	794	0	434.82	20.07	136.5	65.2	2.19	93.26	40.66	17.4	0.5674	6.98457	10.4154	1210	289714	1201	0	Sedimentary	Eocene
PE1	118	30.4	2.97	7.67	249	0	122	33.99	4.69	3.51	0.52	45.35	3.55	-	-	-	-	-	-	-	-	Sedimentary	Cretaceous
PET	120	28.9	3.66	7.77	370	0	198.25	52.34	3.11	1.55	1.2	53.17	18.02	20.4	0.2831	4.99154	15.4085	10285	698370	6736	0	Sedimentary	Paleocene
PIN	1038	29.3	2	8.271	100	0	47.02	3.81	2.82	3.34	3.08	5.47	4.26	5.93	0.3201	0.207449	5.72255	4730	0	8962	0	Volcanic	Miocene
PO1	160	32.8	11.38	9.242	294	0	202.1	10.52	5.71	5.45	0.84	21.11	28.92	-	-	-	-	-	-	-	-	Sedimentary	Cretaceous
PO2	152	30.5	5.43	8.3	277	0	190.6	0.61	3.03	2.05	0.79	29.32	20.62	-	-	-	-	-	-	-	-	Sedimentary	Cretaceous
QUE	120	32.3	4.53	8.5	204	0	183	1.5	6.92	5.3	2.53	48.48	4.74	31.1	2.343	0.3698	30.7302	7972	0	7247	0	Sedimentary	Cretaceous
ROS	126	28	1.65	7.2	987	0	387.5	243.24	2.96	2.72	2	165.2	43.86	19	0.786	3.63416	15.3658	13917	1010956	1520	0	Sedimentary	Cretaceous
SAB	7	32	7.4	9.7	2120	0	183.14	1133.1	249	177.5	32.43	357	202.4	4.3	0.4	0.1	4.2	-	-	-	-	Sedimentary	Miocene
SAC	170	33.7	6.14	9.02	412	0	162.6	12.15	20	18.6	7.89	35.58	9.72	15.5	1.278	0.358905	15.1411	10328	1388	14976	0	Sedimentary	Quaternary
SAL	105	29.9	5.8	7	4520	0	119.46	3256.4	158	131.3	28.4	668.65	382.95	16.7	0.5426	5.44788	11.2521	-	-	-	-	Sedimentary	Paleocene
SEN	3	31.2	7.15	9.03	1370	10.46	142.97	218.98	357.5	176.3	5.54	69.1	59.32	15.2	0.2708	8.14517	7.05483	0	78002	0	0	Sedimentary	Neogene
SEP	266	31	5.76	8.45	216	0	147.42	2.28	1.45	0.28	0.12	37.53	7.11	10.3	0.9631	0.191127	10.1089	13933	0	16032	0	Sedimentary	Cretaceous
SIJ	0	31.7	7.06	8.98	1160	0	122.88	330.36	215	129.5	5.71	80.74	53.67	33.3	2.82	3.1	30.2	-	-	-	-	Sedimentary	Neogene
SIL	69	30	6.4	8.68	205	0	151.24	3.09	11.6	15.38	3.6	36.88	7.29	41.6	3.207	0.187571	41.4124	4360	522	4500	0	Sedimentary	Eocene
TEK	24	27.2	3	7.3	1030	-	415	-	-	55	-	121	17	17.6	1.342	1.76145	15.8385	9948	46055	4372	0	Sedimentary	Oligocene
TIC	17	32	1.56	7.238	100	0	283.4	3.28	42.4	46	21.85	44.18	16.59	17.5	1.253	0.214664	17.2853	-	-	-	-	Plutonic	Cretaceous
VAL	18	30.6	7.36	8.54	211	0	152.42	2.27	14.4	21.4	3.6	32.22	7.06	5.6	0.2691	0.559248	5.04075	13710	9833	9755	0	Sedimentary	Eocene
VER	1609	21.5	4.51	7.5	83	0	11.43	2.86	1.1	0.53	0.92	1.57	2.14	9.52	-	0.138872	9.38113	1855	2507	850	50987	Volcanic	Quaternary
YAL	2	32.1	7.27	9.53	1930	97.63	378.11	42.57	564	302	45.62	15.41	142.56	13.4	0.26	10.3	3.1	-	-	-	-	Sedimentary	Eocene
YAX	164	31	7.68	8.55	278	-	118	7	13	10	4	23	5	-	-	-	-	-	-	-	-	Sedimentary	Quaternary
YOJ	639	27.8	2.73	8.31	100	0	88.96	3.01	1.67	2.13	1.45	24.75	2.85	13.3	1.302	0.108289	13.1917	29300	759	7872	1250	Volcanic	Quaternary
YUM	16	26.4	4.15	7.54	1060	0	439.55	81.33	148.5	79	10.8	127.17	39.73	12.3	-	11.0937	1.2063	0	601505	0	0	Sedimentary	Eocene
